# Supplementary material for: Coaxial TiO2–carbon nanotube sponges as compressible anodes for lithium-ion batteries
Source: Royal Society of Chemistry journal article supplement (doi:10.1039/c6ta01071g), 2016-01-01
Supplement: c6ta01071g1.pdf [file c6ta01071g1.pdf]

## **Supporting Information**

### **Coaxial TiO<sub>2</sub>-Carbon Nanotube Sponges as Compressible Anodes for Lithium-Ion Batteries**

Mingchu Zou,<sup>1</sup> Zhimin Ma,<sup>1</sup> Qingfei Wang,<sup>1</sup> Yanbing Yang,<sup>2</sup> Shiting Wu,<sup>1</sup> Liusi Yang,<sup>1</sup> Song Hu,<sup>1</sup>  
Wenjing Xu,<sup>1</sup> Pingchou Han<sup>1</sup>, Ruqiang Zou<sup>1</sup>, Anyuan Cao<sup>1\*</sup>

<sup>1</sup> Department of Materials Science and Engineering, College of Engineering, Peking University, Beijing 100871, China

<sup>2</sup> College of Chemistry and Molecular Sciences, Wuhan University, Wuhan 430072, China

<sup>3</sup> College of Electromechanical Engineering, Qingdao University, Qingdao 266071, China

## **Supporting Information**

**Figure S1**

**Figure S2**

**Figure S3**

**Figure S4**

**Figure S5**

**Figure S6**

**Figure S7**

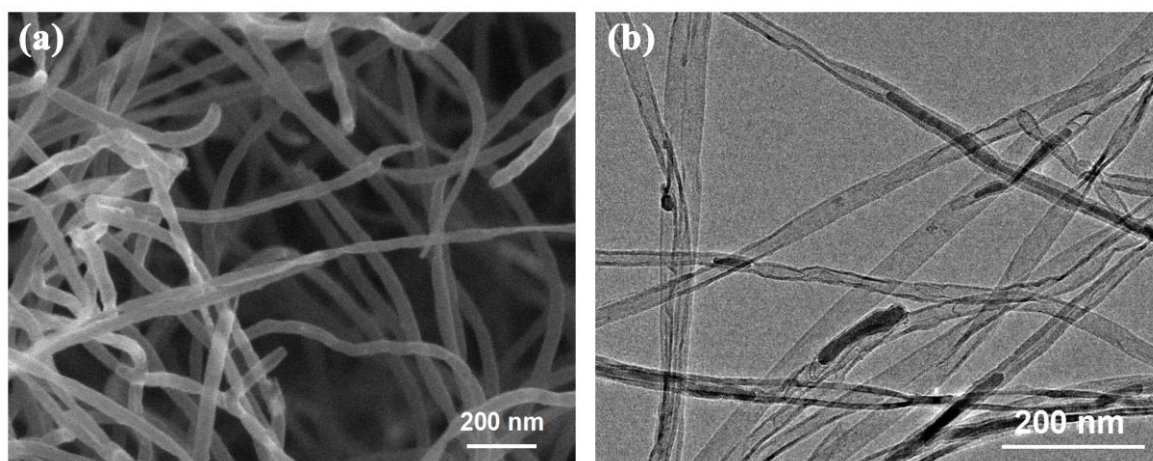

**Fig. S1** (a) SEM image of CNT sponge. (b) TEM image of CNT sponge.

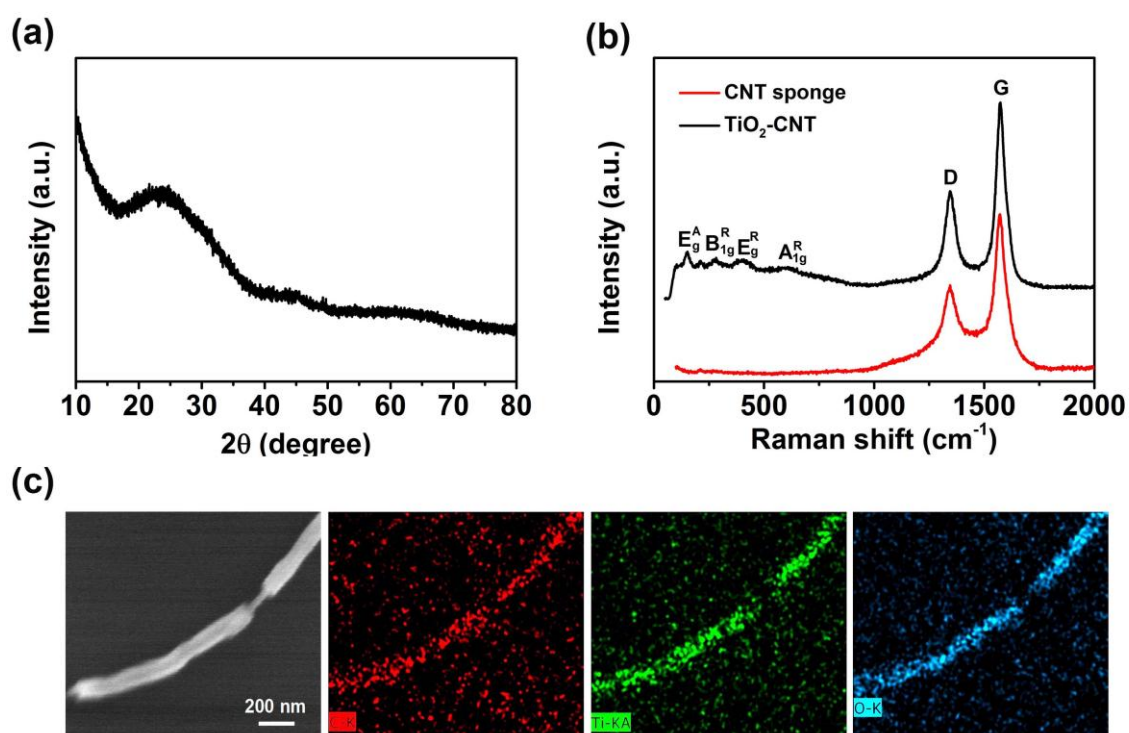

**Fig. S2** (a) XRD pattern of pure CNT sponges. (b) Raman spectra of anatase  $\text{TiO}_2$ -CNT sponges. (c) Energy-dispersive X-ray spectrometer (EDX) elemental mapping analysis of a  $\text{TiO}_2$ -CNT coaxial structure (left SEM image). The red pattern represents the carbon element from internal CNT, while the green and blue patterns represent the titanium and oxygen element from external  $\text{TiO}_2$  layer, respectively. The dots in the background come from dispersed solution after sonication dropped on the substrate.

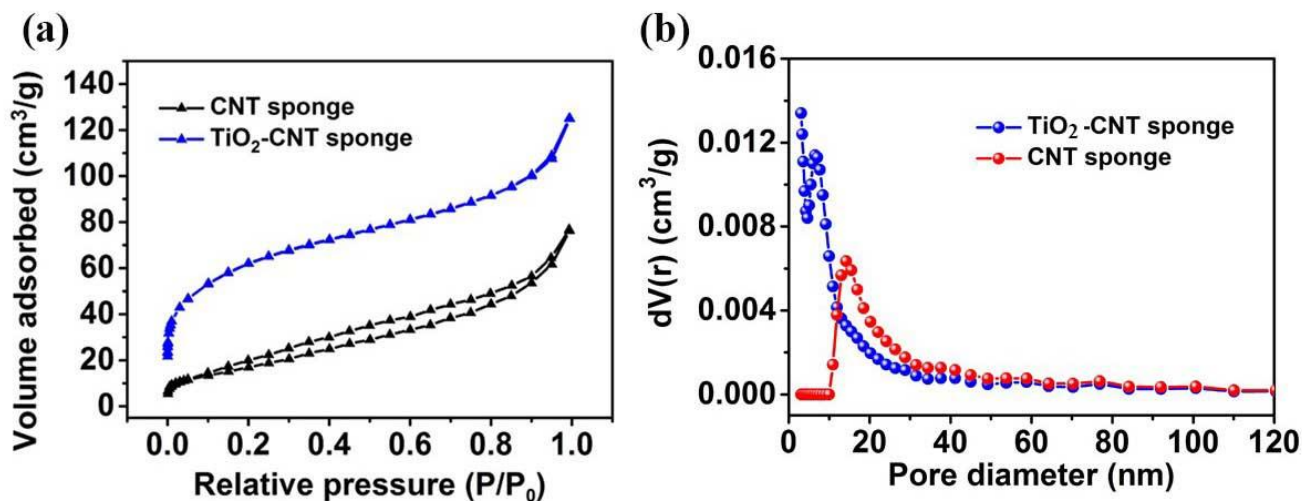

**Fig. S3** (a) Nitrogen sorption isotherms for CNT sponges and TiO<sub>2</sub>-CNT sponges. (b) The pore size distributions for respective samples.

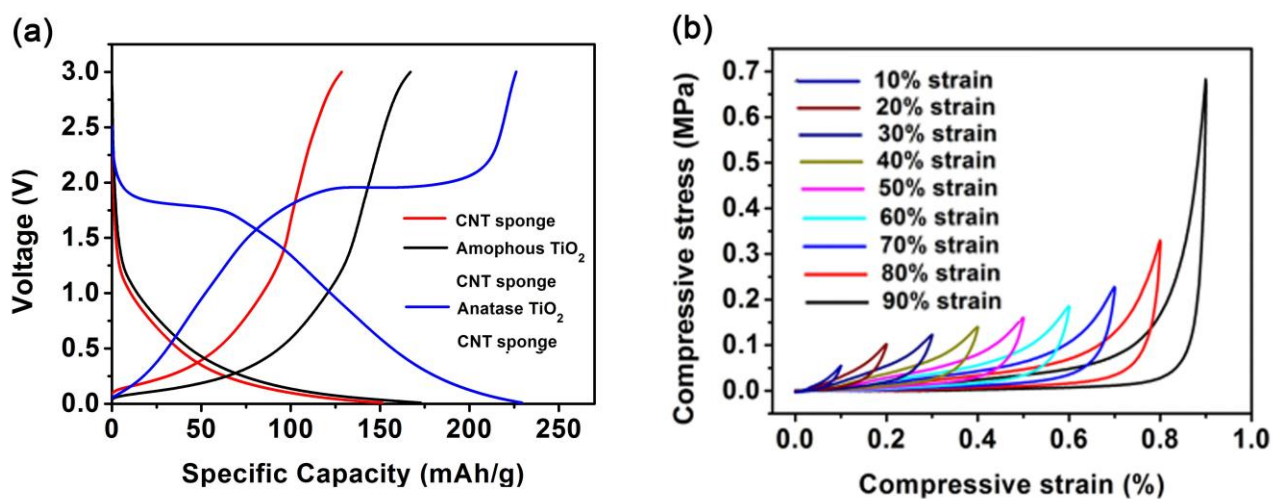

**Fig. S4** (a) Charge/discharge voltage profiles of the CNT sponge, amorphous TiO<sub>2</sub>-CNT sponge and anatase TiO<sub>2</sub>-CNT sponge. (b) Compressive  $\sigma$ - $\epsilon$  curves of anatase TiO<sub>2</sub>-CNT sponges at 10 %-90 % strain.

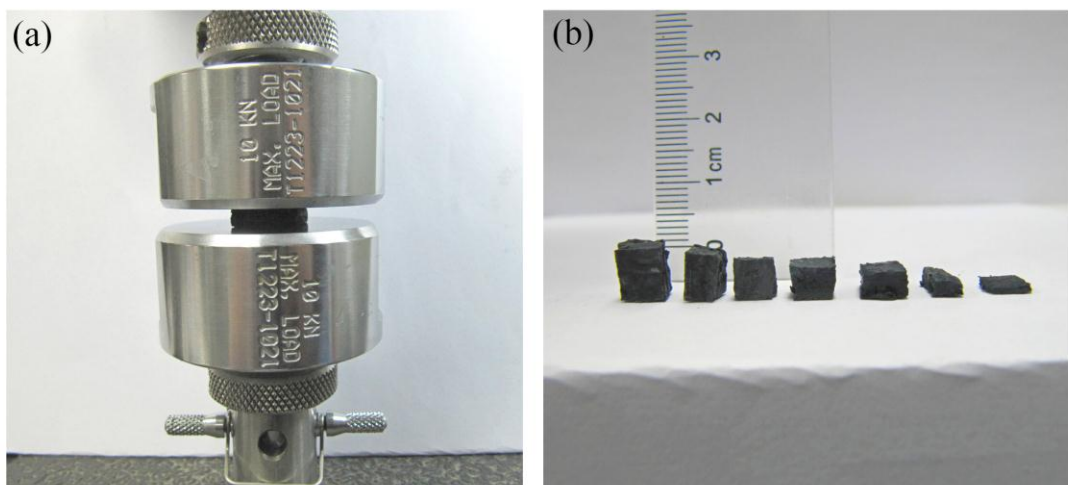

**Fig. S5** Photos of (a) compressing a composite sponge and (b) anatase  $\text{TiO}_2$ -CNT sponges with different initial thicknesses ( $h_i$ ).

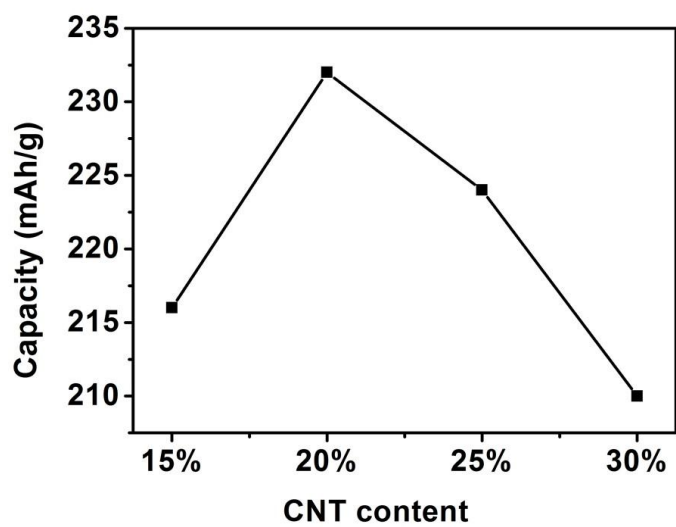

**Fig. S6** Specific capacities of anatase  $\text{TiO}_2$ -CNT sponge anodes with different CNT contents.

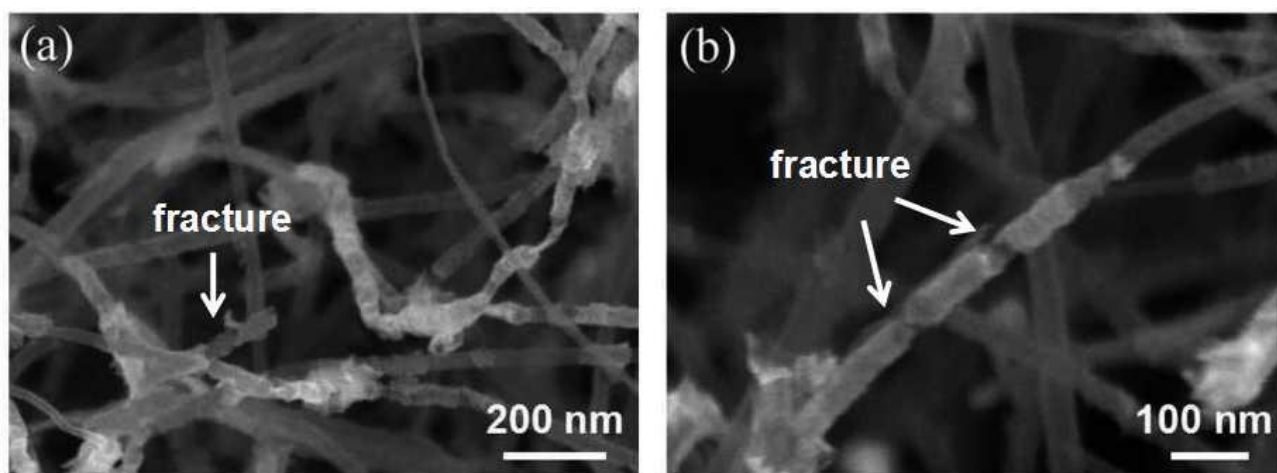

**Fig. S7** (a) Low- and (b) High-magnification SEM images of anatase  $\text{TiO}_2$ -CNT sponges after 1000 cycles compression. The  $\text{TiO}_2$  layer coating on CNTs was partially broken (white arrows).
